# Supplementary material
Source: PubMed Central journal article supplement (PMC7407600)
Supplement: renoux_web_material_final_kwaa012.pdf [file renoux_web_material_final_kwaa012.pdf]

## Web Material

### **$\beta$ 2-agonists and the incidence of Parkinson disease**

Francesco Giorgianni, Pierre Ernst, Sophie Dell’Aniello, Samy Suissa, and Christel Renoux

**Table of contents:** Web Figure 1, Web Tables 1–9

**Web Figure 1. Cohort formation and case control selection**

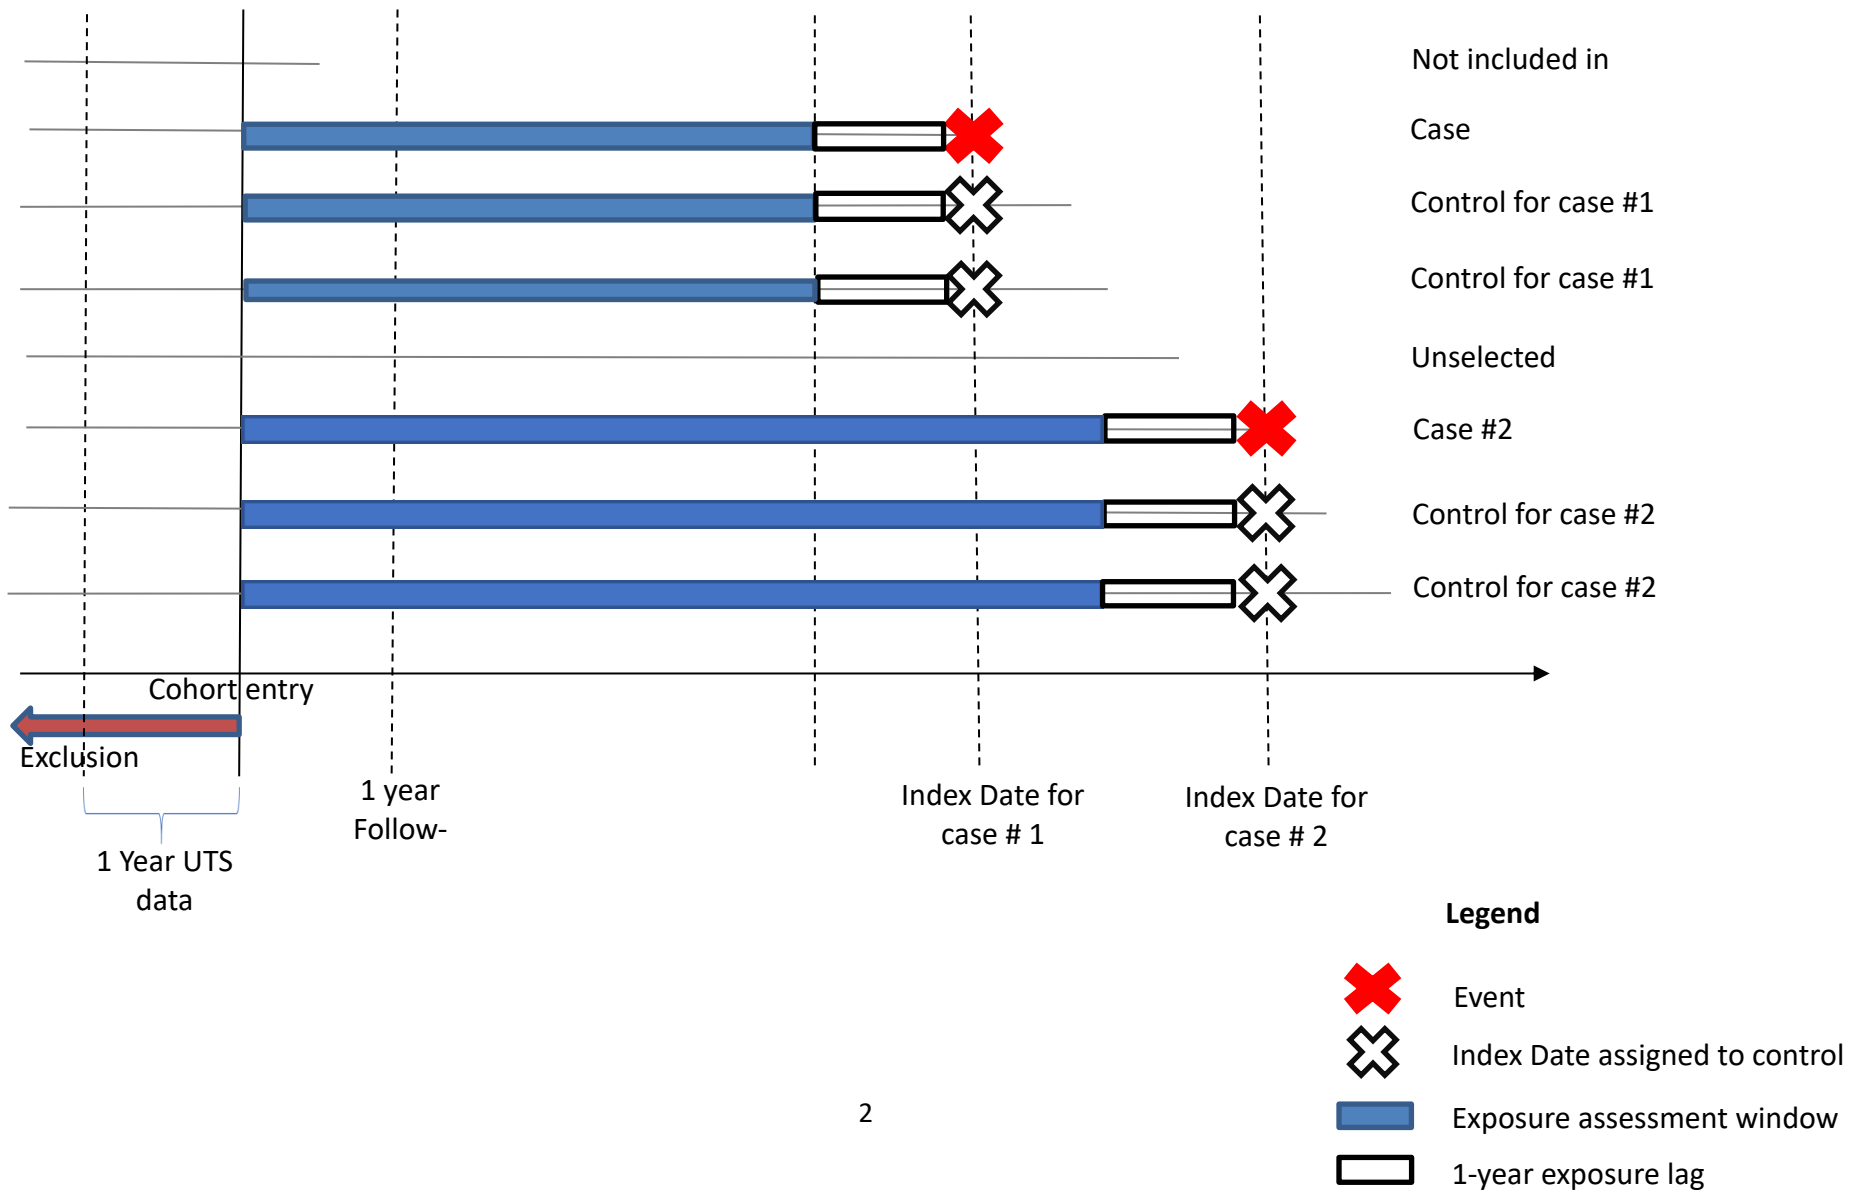

**Web Table 1. Crude and adjusted rate ratios of Parkinson’s disease associated with ever use of beta 2 agonists, stratified by short- and long-acting and by route of administration, United Kingdom, 1995-2016**

| <b>Exposure</b>                     | <b>Cases<br/>n (%)</b> | <b>Controls<sup>a</sup><br/>n (%)</b> | <b>Crude RR</b> | <b>Adjusted RR<br/>(95% CI)<sup>b</sup></b> |
|-------------------------------------|------------------------|---------------------------------------|-----------------|---------------------------------------------|
| No use                              | 7,972 (92.7)           | 78,646 (91.4)                         | 1.00            | 1.00 (Reference)                            |
| <b>Short acting beta 2 agonists</b> | 620 (7.2)              | 7,195 (8.4)                           | 0.85            | 0.83 (0.76 - 0.92)                          |
| Cumulative duration of use          |                        |                                       |                 |                                             |
| < 3 months                          | 254 (3.0)              | 2,933 (3.4)                           | 0.85            | 0.81 (0.71 - 0.92)                          |
| 3 - 24 months                       | 237 (2.8)              | 2,816 (3.3)                           | 0.83            | 0.82 (0.71 - 0.94)                          |
| > 24 months                         | 129 (1.5)              | 1,446 (1.7)                           | 0.87            | 0.97 (0.79 - 1.19)                          |
| No use                              | 7,972 (92.7)           | 78,646 (91.4)                         | 1.00            | 1.00 (Reference)                            |
| <b>Long acting beta2 agonists</b>   | 157 (1.8)              | 1,865 (2.3)                           | 0.82            | 0.89 (0.74 - 1.08)                          |
| Cumulative duration of use          |                        |                                       |                 |                                             |
| < 3 months                          | 25 (0.3)               | 349 (0.4)                             | 0.70            | 0.70 (0.46 - 1.05)                          |
| 3 months - 24 months                | 60 (0.7)               | 737 (0.9)                             | 0.80            | 0.86 (0.65 - 1.14)                          |
| > 24 months                         | 72 (0.8)               | 779 (1.0)                             | 0.90            | 1.05 (0.80 - 1.38)                          |
| No use                              | 7,972 (92.7)           | 78,646 (91.4)                         | 1.00            | 1.00 (Reference)                            |
| <b>Inhaled beta 2 agonists</b>      | 588 (6.8)              | 6,887 (8.0)                           | 0.84            | 0.83 (0.75 - 0.91)                          |
| Cumulative duration of use          |                        |                                       |                 |                                             |
| < 3 months                          | 224 (2.6)              | 2,505 (2.9)                           | 0.88            | 0.83 (0.73 - 0.96)                          |
| 3 - 24 months                       | 209 (2.4)              | 2,653 (3.1)                           | 0.77            | 0.76 (0.66 - 0.89)                          |
| > 24 months                         | 155 (1.8)              | 1,729 (2.0)                           | 0.88            | 0.97 (0.80 - 1.17)                          |
| No use                              | 7,972 (92.7)           | 78,646 (91.4)                         | 1.00            | 1.00 (Reference)                            |
| <b>Oral beta 2 agonists</b>         | 62 (0.7)               | 773 (0.9)                             | 0.79            | 0.75 (0.58 – 0.98)                          |
| Cumulative duration of use          |                        |                                       |                 |                                             |
| < 3 months                          | 47 (0.5)               | 541 (0.6)                             | 0.85            | 0.81 (0.60 - 1.09)                          |
| > 3 months                          | 15 (0.2)               | 232 (0.3)                             | 0.64            | 0.62 (0.36 - 1.04)                          |

Abbreviations: RR, rate ratio; CI, confidence interval.

<sup>a</sup> Cases and controls were matched on age, sex, date of cohort entry, and duration of follow-up.

<sup>b</sup> Adjusted for variables listed in table 1, and use of beta blockers, respiratory antimuscarinic drugs and use of other beta 2 agonists.

**Web Table 2. Crude and adjusted rate ratios of Parkinson’s disease associated with ever use of beta 2 agonists compared with no use using a 60-day grace period, United Kingdom, 1995-2016**

| <b>Exposure</b>                   | <b>Cases<br/>n (%)</b> | <b>Controls<sup>a</sup><br/>n (%)</b> | <b>Crude RR</b> | <b>Adjusted RR<br/>(95% CI)<sup>b</sup></b> |
|-----------------------------------|------------------------|---------------------------------------|-----------------|---------------------------------------------|
| <b>Cumulative duration of use</b> |                        |                                       |                 |                                             |
| < 3 months                        | 82 (1.0)               | 822 (1.0)                             | 0.98            | 0.93 (0.74 - 1.17)                          |
| 3 - 24 months                     | 380 (4.4)              | 4678 (5.4)                            | 0.80            | 0.77 (0.69 - 0.86)                          |
| > 24 months                       | 170 (2.0)              | 1894 (2.2)                            | 0.88            | 0.96 (0.80 - 1.15)                          |

Abbreviations: RR, rate ratio; CI, confidence interval.

<sup>a</sup> Cases and controls were matched on age, sex, date of cohort entry, and duration of follow-up.

<sup>b</sup> Adjusted for variables listed in table 1, and use of beta blockers and respiratory antimuscarinic drugs.

**Web Table 3. Crude and adjusted rate ratios of Parkinson’s disease associated with ever use of beta 2 agonists compared with no-use with exposure defined as at least 4 prescriptions within 1 year, United Kingdom, 1995-2016**

| <b>Exposure</b>                                         | <b>Cases<br/>n (%)</b> | <b>Controls<sup>a</sup><br/>n (%)</b> | <b>Crude RR</b> | <b>Adjusted RR<br/>(95% CI)<sup>b</sup></b> |
|---------------------------------------------------------|------------------------|---------------------------------------|-----------------|---------------------------------------------|
| No use                                                  | 8,378 (97.4)           | 83,300 (96.8)                         | 1.00            | 1.00 (Reference)                            |
| At least 4 beta 2 agonist prescriptions within one year | 226 (2.6)              | 2,740 (3.2)                           | 0.82            | 0.89 (0.76 - 1.05)                          |

Abbreviations: RR, rate ratio; CI, confidence interval.

<sup>a</sup> Cases and controls were matched on age, sex, date of cohort entry, and duration of follow-up.

<sup>b</sup> Adjusted for variables listed in table 1, and use of beta blockers and respiratory antimuscarinic drugs.

**Web Table 4. Crude and adjusted rate ratios of Parkinson's disease associated with ever use of beta 2 agonists compared with no-use, varying the duration of SABA prescriptions with unknown duration, United Kingdom, 1995-2016**

| Exposure                                                                                  | Cases<br>n (%) | Controls <sup>a</sup><br>n (%) | Crude RR | Adjusted RR<br>(95% CI) <sup>b</sup> |
|-------------------------------------------------------------------------------------------|----------------|--------------------------------|----------|--------------------------------------|
| <b>Cumulative duration of use, assuming as-needed SABA prescriptions to last 1 month</b>  |                |                                |          |                                      |
| Beta 2 agonists                                                                           |                |                                |          |                                      |
| < 3 months                                                                                | 273 (3.2)      | 3020 (3.5)                     | 0.89     | 0.84 (0.74 - 0.96)                   |
| 3 - 24 months                                                                             | 214 (2.5)      | 2812 (3.3)                     | 0.75     | 0.74 (0.64 - 0.86)                   |
| > 24 months                                                                               | 145 (1.7)      | 1562 (1.8)                     | 0.91     | 1.01 (0.83 - 1.23)                   |
| SABA <sup>c</sup>                                                                         |                |                                |          |                                      |
| < 3 months                                                                                | 269 (3.1)      | 3065 (3.6)                     | 0.86     | 0.82 (0.72 - 0.93)                   |
| 3 -24 months                                                                              | 242 (2.8)      | 2899 (3.4)                     | 0.82     | 0.82 (0.72 - 0.94)                   |
| > 24 months                                                                               | 109 (1.3)      | 1231 (1.4)                     | 0.87     | 0.97 (0.78 - 1.21)                   |
| <b>Cumulative duration of use, assuming as-needed SABA prescriptions to last 6 months</b> |                |                                |          |                                      |
| Beta 2 agonists                                                                           |                |                                |          |                                      |
| < 3 months                                                                                | 93 (1.1)       | 960 (1.1)                      | 0.95     | 0.90 (0.73 - 1.12)                   |
| 3 - 24 months                                                                             | 353 (4.1)      | 4,258 (4.9)                    | 0.81     | 0.78 (0.70 - 0.88)                   |
| > 24 months                                                                               | 186 (2.2)      | 2,176 (2.5)                    | 0.84     | 0.90 (0.76 - 1.07)                   |
| SABA <sup>c</sup>                                                                         |                |                                |          |                                      |
| < 3 months                                                                                | 85 (1.0)       | 905 (1.1)                      | 0.92     | 0.88 (0.70 - 1.10)                   |
| 3 -24 months                                                                              | 361 (4.2)      | 4,313 (5.0)                    | 0.82     | 0.80 (0.71 - 0.89)                   |
| > 24 months                                                                               | 174 (2.0)      | 1,977 (2.3)                    | 0.86     | 0.93 (0.78 - 1.10)                   |

Abbreviations: SABA, short-acting beta2 agonist; RR, rate ratio; CI, confidence interval.

<sup>a</sup> Cases and controls were matched on age, sex, date of cohort entry, and duration of follow-up.

<sup>b</sup> Adjusted for variables listed in table 1, and use of beta blockers and respiratory antimuscarinic drugs.

<sup>c</sup> Adjusted for other beta 2 agonists.

**Web Table 5. Crude and adjusted rate ratios of Parkinson’s disease associated with ever use of beta 2 agonists compared with no-use using a stricter case definition<sup>a</sup>, United Kingdom, 1995-2016**

| <b>Exposure</b>            | <b>Cases<br/>n (%)</b> | <b>Controls<sup>b</sup><br/>n (%)</b> | <b>Crude RR</b> | <b>Adjusted RR<br/>(95% CI)<sup>c</sup></b> |
|----------------------------|------------------------|---------------------------------------|-----------------|---------------------------------------------|
| No use                     | 6,954 (92.6)           | 68,359 (91.0)                         | 1.00            | 1.00 (Reference)                            |
| Beta 2 agonists            | 558 (7.4)              | 6,761 (9.0)                           | 0.81            | 0.80 (0.73 - 0.89)                          |
| Cumulative duration of use |                        |                                       |                 |                                             |
| < 3 months                 | 230 (3.1)              | 2,647 (3.5)                           | 0.85            | 0.81 (0.70 - 0.93)                          |
| 3 -24 months               | 194 (2.6)              | 2,449 (3.3)                           | 0.77            | 0.77 (0.66 - 0.89)                          |
| > 24 months                | 134 (1.8)              | 1,665 (2.2)                           | 0.78            | 0.87 (0.71 - 1.07)                          |

Abbreviations: RR, rate ratio; CI, confidence interval.

<sup>a</sup> Cases of Parkinson’s disease restricted to those with at least 2 prescriptions for antiparkinson drugs along with PD diagnosis within one year.

<sup>b</sup> Cases and controls were matched on age, sex, date of cohort entry, and duration of follow-up.

<sup>c</sup> Adjusted for variables listed in table 1, and use of beta blockers and respiratory antimuscarinic drugs.

**Web Table 6. Crude and adjusted rate ratios of Parkinson’s disease associated with ever use of beta 2 agonists compared with no use using multiple imputation for missing values for BMI and smoking, United Kingdom, 1995-2016**

| <b>Exposure</b>            | <b>Cases<br/>n (%)</b> | <b>Controls<sup>a</sup><br/>n (%)</b> | <b>Crude RR</b> | <b>Adjusted RR<br/>(95% CI)<sup>b</sup></b> |
|----------------------------|------------------------|---------------------------------------|-----------------|---------------------------------------------|
| No use                     | 7,972 (92.7)           | 78,646 (91.4)                         | 1.00            | 1.00 (Reference)                            |
| Beta 2 agonists            | 632 (7.3)              | 7,394 (8.6)                           | 0.84            | 0.83 (0.76 - 0.91)                          |
| Cumulative duration of use |                        |                                       |                 |                                             |
| < 3 months                 | 257 (3.0)              | 2,896 (3.4)                           | 0.87            | 0.83 (0.73 - 0.95)                          |
| 3 – 24 months              | 219 (2.5)              | 2,762 (3.2)                           | 0.78            | 0.77 (0.66 - 0.89)                          |
| > 24 months                | 156 (1.8)              | 1,736 (2.0)                           | 0.88            | 0.98 (0.81 - 1.18)                          |

Abbreviations: BMI, body mass index; RR, rate ratio; CI, confidence interval.

<sup>a</sup> Cases and controls were matched on age, sex, date of cohort entry, and duration of follow-up.

<sup>b</sup> Adjusted for variables listed in table 1, and use of beta blockers and respiratory antimuscarinic drugs.



**Web Table 7. Crude and adjusted rate ratios of Parkinson’s disease associated with ever use of salbutamol compared with no use, United Kingdom, 1995-2016**

| <b>Exposure</b>                                    | <b>Cases<br/>n (%)</b> | <b>Controls<sup>a</sup><br/>n (%)</b> | <b>Crude RR</b> | <b>Adjusted RR<br/>(95% CI)<sup>b</sup></b> |
|----------------------------------------------------|------------------------|---------------------------------------|-----------------|---------------------------------------------|
| No use                                             | 7,972 (92.7)           | 78,646 (91.4)                         | 1.00            | 1.00 (Reference)                            |
| Salbutamol                                         | 569 (6.6)              | 6,597 (7.7)                           | 0.85            | 0.84 (0.76 - 0.92)                          |
| Cumulative duration of use                         |                        |                                       |                 |                                             |
| < 3 months                                         | 226 (2.6)              | 2,610 (3.0)                           | 0.85            | 0.81 (0.71 - 0.93)                          |
| 3 - 24 months                                      | 220 (2.6)              | 2,628 (3.1)                           | 0.82            | 0.82 (0.71 - 0.95)                          |
| > 24 months                                        | 123 (1.4)              | 1,359 (1.6)                           | 0.89            | 0.99 (0.80 - 1.22)                          |
| No use                                             | 8,378 (97.4)           | 83,300 (96.8)                         | 1.00            | 1.00 (Reference)                            |
| At least 4 prescriptions of salbutamol in one year | 181 (2.1)              | 2,214 (2.6)                           | 0.85            | 0.89 (0.75 - 1.06)                          |

Abbreviations: RR, rate ratio; CI, confidence interval.

<sup>a</sup> Cases and controls were matched on age, sex, date of cohort entry, and duration of follow-up.

<sup>b</sup> Adjusted for variables listed in table 1, and use of beta blockers, respiratory antimuscarinic drugs, and other beta 2 agonists.

**Web Table 8. Crude and adjusted rate ratios of Parkinson’s disease associated with ever use of respiratory antimuscarinic drugs compared with no use, United Kingdom, 1995-2016**

| <b>Exposure</b>                                     | <b>Cases<br/>n (%)</b> | <b>Controls<sup>a</sup><br/>n (%)</b> | <b>Crude<br/>RR</b> | <b>Adjusted RR<br/>(95% CI)<sup>b</sup></b> |
|-----------------------------------------------------|------------------------|---------------------------------------|---------------------|---------------------------------------------|
| No use                                              | 8,492 (98.7)           | 84,513 (98.2)                         | 1.00                | 1.00 (Reference)                            |
| Antimuscarinics                                     | 112 (1.3)              | 1,527 (1.8)                           | 0.73                | 0.88 (0.71 - 1.08)                          |
| Cumulative duration of use                          |                        |                                       |                     |                                             |
| < 3 months                                          | 29 (0.3)               | 380 (0.4)                             | 0.76                | 0.83 (0.57 - 1.23)                          |
| 3 - 24 months                                       | 49 (0.6)               | 610 (0.7)                             | 0.80                | 0.98 (0.72 - 1.32)                          |
| > 24 months                                         | 34 (0.4)               | 537 (0.6)                             | 0.63                | 0.79 (0.55 - 1.13)                          |
| No use                                              | 8,535 (99.2)           | 85,079 (98.9)                         | 1.00                | 1.00 (Reference)                            |
| At least 4 antimuscarinic prescriptions in one year | 69 (0.8)               | 961 (1.1)                             | 0.71                | 0.90 (0.70 - 1.17)                          |

Abbreviations: RR, rate ratio; CI, confidence interval.

<sup>a</sup> Cases and controls were matched on age, sex, date of cohort entry, and duration of follow-up.

<sup>b</sup> Adjusted for variables listed in table 1, and use of beta blockers and beta 2 agonists.

**Web Table 9. Crude and adjusted rate ratios of Parkinson’s disease associated with ever use of beta-blockers compared with no use using different lag times, United Kingdom, 1995-2016**

| <b>Exposure</b>                   | <b>Cases<br/>n (%)</b> | <b>Controls<sup>a</sup><br/>n (%)</b> | <b>Crude RR</b> | <b>Adjusted RR<br/>(95% CI)<sup>b</sup></b> |
|-----------------------------------|------------------------|---------------------------------------|-----------------|---------------------------------------------|
| <b>With a 2-year exposure lag</b> |                        |                                       |                 |                                             |
| Non use                           | 6,257 (80.9)           | 65,703 (85.0)                         | 1.00            | 1.00 (Reference)                            |
| Beta-blockers                     | 1,475 (19.1)           | 11,617 (15.0)                         | 1.37            | 1.34 (1.25 - 1.43)                          |
| Cumulative duration of use        |                        |                                       |                 |                                             |
| < 1 year                          | 616 (8.0)              | 4,258 (5.5)                           | 1.54            | 1.49 (1.36 - 1.63)                          |
| 1 - 5 years                       | 587 (7.6)              | 4,700 (6.1)                           | 1.34            | 1.31 (1.20 - 1.44)                          |
| > 5 years                         | 272 (3.5)              | 2,659 (3.4)                           | 1.11            | 1.09 (0.95 - 1.25)                          |
| <b>With a 3-year exposure lag</b> |                        |                                       |                 |                                             |
| Non use                           | 5,708 (82.4)           | 59,383 (85.7)                         | 1.00            | 1.00 (Reference)                            |
| Beta-blockers                     | 1,220 (17.6)           | 9,897 (14.3)                          | 1.31            | 1.28 (1.19 - 1.37)                          |
| Cumulative duration of use        |                        |                                       |                 |                                             |
| < 1 year                          | 514 (7.4)              | 3,671 (5.3)                           | 1.47            | 1.43 (1.30 - 1.58)                          |
| 1 - 5 years                       | 490 (7.1)              | 4,124 (6.0)                           | 1.26            | 1.23 (1.11 - 1.36)                          |
| > 5 years                         | 216 (3.1)              | 2,102 (3.0)                           | 1.10            | 1.08 (0.93 - 1.25)                          |
| <b>With a 5-year exposure lag</b> |                        |                                       |                 |                                             |
| Non use                           | 6,891 (89.1)           | 70,210 (90.1)                         | 1.00            | 1.00 (Reference)                            |
| Beta-blockers                     | 841 (10.9)             | 7,110 (9.2)                           | 1.23            | 1.22 (1.12 - 1.32)                          |
| Cumulative duration of use        |                        |                                       |                 |                                             |
| <1 year                           | 369 (4.8)              | 2,785 (3.6)                           | 1.37            | 1.35 (1.20 - 1.51)                          |
| 1 - 5 years                       | 349 (4.5)              | 3,118 (4.0)                           | 1.16            | 1.15(1.02 - 1.29)                           |
| > 5 years                         | 123 (1.6)              | 1,207 (1.6)                           | 1.07            | 1.06 (0.87 - 1.29)                          |

RR, rate ratio; CI, confidence interval.

<sup>a</sup> Cases and controls were matched on age, sex, date of cohort entry, and duration of follow-up.

<sup>b</sup> Adjusted for variables listed in table 1, and use of beta 2 agonists and respiratory antimuscarinic drugs.
